# Supplementary material
Source: HighWire-hosted journal article supplement (https://sit.bmj.com/highwire/filestream/336/field_highwire_adjunct_files/2/bmjsit-2021-000088supp003_data_supplement.pdf)
Supplement: bmjsit-2021-000088supp003_data_supplement.pdf [file bmjsit-2021-000088supp003_data_supplement.pdf]

Supplementary Table 3: Perfusion assessment in colorectal surgery

| Ref. No. | Author    | Country                  | Journal                            | Year | Study design                                                  | Patient selection                                            |                     | Fluorogenic agent | Dose                                  | Imaging techniques |                                                                                                                                        |                                                                                          | Endpoint measures                |                                                                                                                        |                                                                                                | Adverse effects                                                                                                                                                                 | Learning curve                                                                                                                                                                                                              | Cost analysis | Other comments | Ref. detail |                                                                                                                                                                                                                                                                                       |
|----------|-----------|--------------------------|------------------------------------|------|---------------------------------------------------------------|--------------------------------------------------------------|---------------------|-------------------|---------------------------------------|--------------------|----------------------------------------------------------------------------------------------------------------------------------------|------------------------------------------------------------------------------------------|----------------------------------|------------------------------------------------------------------------------------------------------------------------|------------------------------------------------------------------------------------------------|---------------------------------------------------------------------------------------------------------------------------------------------------------------------------------|-----------------------------------------------------------------------------------------------------------------------------------------------------------------------------------------------------------------------------|---------------|----------------|-------------|---------------------------------------------------------------------------------------------------------------------------------------------------------------------------------------------------------------------------------------------------------------------------------------|
|          |           |                          |                                    |      |                                                               | Subject                                                      | N                   |                   |                                       | Imaging system     | Quantitative measurement                                                                                                               | Main endpoints                                                                           | Imaging accuracy/success rate    | Clinical impact, changes in intraoperative decision-making                                                             | Clinical impact, advantages in postoperative outcomes                                          |                                                                                                                                                                                 |                                                                                                                                                                                                                             |               |                |             |                                                                                                                                                                                                                                                                                       |
| 1        | Kudrass   | Germany                  | Langenbecks Arch Surg              | 2010 | Retrospective case control                                    | Lap and open Rt. colectomy, Lt. colectomy and proctectomy    | 201 (+201 controls) | ICG               | 0.2-0.5 mg/kg                         | IV                 | NA                                                                                                                                     | IC-View®, Pulsion Medical Systems AG                                                     | Trends of fluorescence intensity | Changes in transection point, incidence of anastomotic leak and postoperative surgical revision, hospital stay         | NA                                                                                             | 16.4% changes in surgical procedure                                                                                                                                             | 4% reduction of surgical revision (3.5% vs 7.5%)                                                                                                                                                                            | None          | NA             | NA          | Kudrass A, Kuehn M, Gellert M, et al. Intraoperative near-infrared fluorescence imaging of colorectal surgery: a noninvasive analysis to reduce the rate of anastomotic leakage. <i>Langenbecks Arch Surg</i> . 2010;395(6):614-619.                                                  |
| 2        | Sherwiner | US                       | Surg Laparosc Endosc Percutan Tech | 2012 | Prospective case series                                       | Sigmoidectomy and proctectomy                                | 7                   | ICG               | 1mL                                   | IV                 | Transanal approach                                                                                                                     | PiaPoint System (NOVADAQ, Canada)                                                        | NA                               | Feasibility (mucosal perfusion on and around the staple line)                                                          | 100% technical success                                                                         | NA                                                                                                                                                                              | 0%                                                                                                                                                                                                                          | None          | NA             | NA          | Sherwiner DA. Transanal near-infrared imaging of colorectal anastomotic perfusion. <i>Surg Laparosc Endosc Percutan Tech</i> . 2012 Oct;22(5):433-6.                                                                                                                                  |
| 3        | Carus     | Germany                  | Surg Technol Int                   | 2012 | Retrospective case series                                     | Laparoscopic colorectal anastomoses and gastric sleeve       | 49                  | ICG               | 0.2 mg/kg                             | IV                 | After colorectal anastomosis or after stapler resection of the stomach (depending on the procedure performed)                          | Karl Storz (the authors are not more specific)                                           | NA                               | Assess perfusion intraoperatively                                                                                      | 47 out of 49 (96%)                                                                             | In two patients (4%), ICG-VA showed delayed perfusion and led to resection.                                                                                                     | All patients recovered uneventfully                                                                                                                                                                                         | NA            | NA             | NA          | Carus T, Dammer R. <i>Surg Technol Int</i> . 2012 Dec;22:27-32.                                                                                                                                                                                                                       |
| 4        | Jafari    | US                       | Surg Endosc                        | 2013 | Retrospective case control                                    | Robotic proctectomy                                          | 16 (+24 controls)   | ICG               | 6-8 mg                                | IV                 | After dissection                                                                                                                       | Fierfly TM, Intuitive Surgical Inc.                                                      | NA                               | Changes in transection point, incidence of anastomotic leak                                                            | NA                                                                                             | 19% changes in transection point                                                                                                                                                | 12% reduction of anastomotic leak (6% vs 18%)                                                                                                                                                                               | None          | NA             | NA          | Jafari MD, Lee KH, Halabi WJ, et al. The use of indocyanine green fluorescence to assess anastomotic perfusion during robotic assisted laparoscopic rectal surgery. <i>Surg Endosc</i> . 2013;27(6):3003-3008.                                                                        |
| 5        | Bae       | Korea                    | Yonsei Med J                       | 2013 | Retrospective case series                                     | Robotic proctectomy                                          | 3                   | ICG               | 2.5-5 mg                              | IV                 | Prior to transection                                                                                                                   | Fierfly TM, Intuitive Surgical Inc.                                                      | Trends of fluorescence intensity | Identification of the IMA, Blood supply to the distal rectum                                                           | 100% (IMA), 67% (perfusion)                                                                    | NA                                                                                                                                                                              | NA                                                                                                                                                                                                                          | None          | NA             | NA          | Bae SH, Bae SH, Lee H, Bae SH, Kim NK, Min BS. Intraoperative near infrared fluorescence imaging in robotic low anterior resection: three case reports. <i>Yonsei Med J</i> . 2013 Jul;54(4):1066-9.                                                                                  |
| 6        | Sherwiner | US                       | Colorectal Dis                     | 2013 | Prospective case series                                       | Lap proctectomy                                              | 20                  | ICG               | 1mL                                   | IV                 | Transanal approach                                                                                                                     | PiaPoint System (NOVADAQ, Canada)                                                        | NA                               | Feasibility (mucosal perfusion), anastomotic leak                                                                      | 100% technical success                                                                         | 10% addition of protective loop ileostomy                                                                                                                                       | 2.4 patients with abnormal angogram leaked                                                                                                                                                                                  | None          | NA             | NA          | Sherwiner DA, Gallagher J, Dowlat T. Intraoperative transanal near infrared imaging of colorectal anastomotic perfusion: a feasibility study. <i>Colorectal Dis</i> . 2013 Jun;15(1):91-6.                                                                                            |
| 7        | Hellan    | US                       | Surg Endosc                        | 2014 | Prospective case series                                       | Robotic Lt. colectomy and proctectomy                        | 40                  | ICG               | 10 mg                                 | IV                 | After complete colorectal mobilization                                                                                                 | Fierfly TM, Intuitive Surgical Inc.                                                      | NA                               | Change of the proximal transection location, operation time, anastomotic leak                                          | NA                                                                                             | 40% changes in transection line                                                                                                                                                 | 5% with change in transection line leaked                                                                                                                                                                                   | None          | NA             | NA          | The use of fluorescence imaging to assess the location of bowel transection during robotic left-sided colorectal surgery. <i>Surg Endosc</i> . 2014;28(5):1695-1702.                                                                                                                  |
| 8        | Ris       | UK                       | Surg Endosc                        | 2014 | Prospective case series                                       | Lap Rt. colectomy, Lt. colectomy and proctectomy             | 30                  | ICG               | 2.5 mg/mL                             | IV                 | Immediately after anastomosis construction                                                                                             | PiaPoint System (NOVADAQ, Canada)                                                        | NA                               | Feasibility, anastomotic leak                                                                                          | 97% technical success                                                                          | 10% avoidance of defunctioning stoma                                                                                                                                            | 0% anastomotic leak                                                                                                                                                                                                         | None          | NA             | NA          | Ris V, Hampre R, Cunningham C, et al. Near-infrared (NIR) perfusion angiography in minimally invasive colorectal surgery. <i>Surg Endosc</i> . 2014;28(7):2221-2226.                                                                                                                  |
| 9        | Kin       | US                       | Dis Colon Rectum                   | 2015 | Retrospective case control                                    | Lap and Open Lt. colectomy and proctectomy                   | 173 (+173 controls) | ICG               | 1mL, followed by a 10 ml saline flush | IV                 | NA                                                                                                                                     | SPY Imaging System (Novadaq Technologies Inc, Bonita Springs, F)                         | NA                               | Anastomotic leak within 60 days and whether angiography changed surgical management were the main outcomes measured    | NA                                                                                             | 4.6% additional colon resection                                                                                                                                                 | 1.1% increase of anastomotic leak (7.5% vs 6.4%)                                                                                                                                                                            | None          | NA             | NA          | Kin C, Ye H, Wehler L, et al. Efficacy of intraoperative fluorescence angiography on colorectal anastomotic leaks. <i>Dis Colon Rectum</i> . 2015;58(6):582-587.                                                                                                                      |
| 10       | Jafari    | US                       | J Am Coll Surg                     | 2015 | Prospective multicenter study                                 | Lap Lt. colectomy and proctectomy                            | 139                 | ICG               | 3.75-7.5 mg                           | IV                 | Just before extraction or resection and anastomosis                                                                                    | PiaPoint System (NOVADAQ, Canada)                                                        | NA                               | Feasibility, safety, incidence of use of fluorescence angiography to aid in surgical decision making, anastomotic leak | 99% technical success                                                                          | 8% changes in surgical plans                                                                                                                                                    | 1.4% anastomotic leak                                                                                                                                                                                                       | None          | NA             | NA          | Jafari MD, Wexner SD, Martz JE, et al. Perfusion assessment in laparoscopic left-sided anastomosis resection (PELLAR-III): a multi-institutional study. <i>J Am Coll Surg</i> . 2015;220(2):282-291.                                                                                  |
| 11       | Watanabe  | Japan                    | Int J Colorectal Dis               | 2015 | Prospective case series                                       | Lap and open Lt. colectomy and proctectomy                   | 119                 | ICG               | 0.5 mg/kg                             | IV                 | After extraction of the specimen                                                                                                       | FLUORO-1 system by Olympus (Novadaq Systems Corporation (Tokyo, Japan) and Tokyo, Japan) | NA                               | Visualization of the blood flow at the marginal artery near the rectosigmoid junction                                  | Classification of the blood flow into 4 types                                                  | NA                                                                                                                                                                              | 5.9% anastomotic leak                                                                                                                                                                                                       | None          | NA             | NA          | Watanabe K, Minami H, Nagahara K, Ishikawa Y, Endo E. Evaluation of the intestinal blood flow near the rectosigmoid junction using the fluorescence camera. <i>Int J Colorectal Dis</i> . 2015;40(12):1637-1641.                                                                      |
| 12       | Protyniak | US                       | Am Surg                            | 2015 | Retrospective                                                 | Laparoscopic colon resection for carcinoma or benign disease | 77                  | ICG               | NA                                    | IV                 | During resection and prior to anastomosis                                                                                              | SPY Elite                                                                                | Trends of fluorescence intensity | Assess colon perfusion                                                                                                 | NA                                                                                             | ICG-VA changed the transection point in four patients (5%); these four patients did not experience postoperative complications                                                  | Two patients developed anastomotic leakage and required resection; one of the two died from sepsis                                                                                                                          | None          | NA             | NA          | Protyniak B, Dinallo AM, Boyan WP Jr, Drossner EM, Aronowitz ML. <i>Am Surg</i> . 2015 Jun;81(6):586-4. doi: 10.1177/000313481508100621.                                                                                                                                              |
| 13       | Kim       | Korea                    | Int J Med Robot                    | 2016 | Retrospective case control                                    | Robotic proctectomy                                          | 123 (+131 controls) | ICG               | 10mg                                  | IV                 | After full mobilization                                                                                                                | Fierfly TM, Intuitive Surgical Inc.                                                      | NA                               | Bowel perfusion, safe anastomosis and lymph node assessment                                                            | NA                                                                                             | Fluorescent imaging correctly determined completion of the bowel adjacent to the anastomosis in 13 patients (10.6%) who were possibly susceptible to anastomotic site ischemia. | 4.6% reduction of anastomotic leak (0.8% vs 5.4%)                                                                                                                                                                           | None          | NA             | NA          | Kim J, Lee J, Yoon S, Austin AS, Kim J. Utility of indocyanine green fluorescent imaging during robot-assisted sphincter-saving surgery on rectal cancer patients. <i>Int J Med Robot</i> . 2016;10(1):1-7.                                                                           |
| 14       | Boni      | Italy                    | Surg Endosc                        | 2016 | Prospective case series                                       | Lap Rt. colectomy, Lt. colectomy and proctectomy             | 107                 | ICG               | 0.2 mg/kg (twice)                     | IV                 | 1) After the division of the mesentery and colon, but before anastomosis, 2) After completion of the anastomosis                       | Karl Storz image1 fluorescence system (Karl Storz, NA Tullingen, Germany)                | NA                               | Feasibility, anastomotic leak                                                                                          | 100% technical success                                                                         | 3.7% changes in anastomosis                                                                                                                                                     | 0.9% anastomotic leak                                                                                                                                                                                                       | None          | NA             | NA          | Boni L, David G, Dionigi G, et al. Indocyanine green-enhanced fluorescence to assess bowel perfusion during laparoscopic colorectal resection. <i>Surg Endosc</i> . 2016;30(7):2736-2742.                                                                                             |
| 15       | Boni      | Italy                    | Surg Endosc                        | 2017 | Retrospective case control                                    | Lap proctectomy                                              | 42 (+38 controls)   | ICG               | 5mL                                   | IV                 | After the division of the mesentery at the level of planned transection                                                                | Karl Storz image1 fluorescence system (Karl Storz, NA Tullingen, Germany)                | NA                               | Changes in transection point, incidence of anastomotic leak                                                            | NA                                                                                             | 4.7% changes in anastomotic level                                                                                                                                               | 5.2% reduction of anastomotic leak (0% vs 5.2%)                                                                                                                                                                             | None          | NA             | NA          | Boni L, Cassiotti E, Indocyanine green fluorescence angiography during laparoscopic low anterior resection: results of a case-matched study. <i>Surg Endosc</i> . 2017 Feb;31(2):248-254.                                                                                             |
| 16       | Wada      | Japan                    | Surg Endosc                        | 2017 | Retrospective case series (prospectively maintained database) | Lap Lt. colectomy and proctectomy                            | 112                 | ICG               | 5mg                                   | IV                 | After distal transection of the bowel, the specimen was extracted extracorporeally and then the proximal color perfusion was evaluated | PDE-neo system; Hamamatsu Photonics K.K., Hamamatsu, Japan                               | F max, T max, T 1/2, and Slope   | Changes in transection point, incidence of anastomotic leak                                                            | Sensitivity and specificity of Fmax for the prediction of AL were 100 and 92.5%, respectively. | 16.1% changes in transection line                                                                                                                                               | 4/18 patients who had changes in transection line based on fluorescence imaging developed anastomotic leak. Only 1/94 patients who didn't have changes in transection line leaked.                                          | None          | NA             | NA          | Wada Y, ICG fluorescence imaging for quantitative evaluation of colonic perfusion in laparoscopic colorectal surgery. <i>Surg Endosc</i> . 2017 Feb;31(2):248-254.                                                                                                                    |
| 17       | Kim       | Korea                    | Dis Colon Rectum                   | 2017 | Retrospective case control                                    | Robotic proctectomy                                          | 310 (+347 controls) | ICG               | 10mg                                  | IV                 | Immediately after colorectal mobilization                                                                                              | Fierfly TM, Intuitive Surgical Inc.                                                      | Trends of fluorescence intensity | Anastomotic leak and stricture                                                                                         | NA                                                                                             | NA                                                                                                                                                                              | 4.6% reduction of anastomotic leak (0.6% vs 5.2%)                                                                                                                                                                           | None          | NA             | NA          | Kim J, Lee J, Yoon S, Wada T, Takahashi R, Hsiamon S, Hida K, Sakai Y. Evaluation of intestinal perfusion by ICG fluorescence imaging in laparoscopic colorectal surgery with DST anastomosis. <i>Surg Endosc</i> . 2017 Mar;31(3):1061-1069.                                         |
| 18       | Kawada    | Japan                    | Surg Endosc                        | 2017 | Prospective case series                                       | Lap Lt. colectomy and proctectomy                            | 68                  | ICG               | 5 mg                                  | IV                 | After distal transection of the bowel and extracorporeal extraction of the specimen                                                    | PDE-neo system; Hamamatsu Photonics K.K., Hamamatsu, Japan                               | NA                               | Changes in transection line, anastomotic leak, factors affecting poor intestinal perfusion                             | NA                                                                                             | 26.5% changes in transection line                                                                                                                                               | 4.5% anastomotic leak                                                                                                                                                                                                       | None          | NA             | NA          | Kawada Y, ICG fluorescence imaging for quantitative evaluation of colonic perfusion in laparoscopic colorectal surgery with DST anastomosis. <i>Surg Endosc</i> . 2017 Mar;31(3):1061-1069.                                                                                           |
| 19       | Ris       | Switzerland, UK, Ireland | Br J Surg                          | 2018 | Prospective single arm multicenter study                      | Any elective colorectal operation with anastomosis           | 504                 | ICG               | 7.5 mg                                | IV                 | After the surgeon had decided on the proximal site of division                                                                         | PPPOINT® Endoscopic Fluorescence Imaging System (Styker, Kalamazoo, Michigan, USA)       | NA                               | Fluorescent signal quality, duration of the ICG procedure, anastomotic leak                                            | 100% technical success                                                                         | 5.8% changes in the site of bowel division                                                                                                                                      | 2.4% anastomotic leak                                                                                                                                                                                                       | None          | NA             | NA          | Note of the 29/504 patients who had changes in the site of bowel division leaked RAS. Near-Infrared Anastomotic Perfusion Assessment Network V00B. Multicentre phase II trial of near-infrared imaging in elective colorectal surgery. <i>Br J Surg</i> . 2018 Sep;105(10):1359-1367. |
| 20       | Mizahi    | US                       | Tech Coloproctol                   | 2018 | Retrospective                                                 | Transanal total mesorectal excision for rectal cancer        | 54                  | ICG               | 0.1 to 0.3 mg/kg                      | IV                 | Twice: Before transection and after anastomosis                                                                                        | PPPOINT (Novadaq)                                                                        | NA                               | Effect of ICG-VA use in predicting anastomotic leakage                                                                 | NA                                                                                             | ICG-VA changed the proximal resection margin in 10 patients (18.5%)                                                                                                             | One of the patients whose proximal resection margin was changed experienced anastomotic leakage postoperatively and required loop ileostomy; one patient without a change in the proximal resection margin also experienced | None          | NA             | NA          | Mizahi I, de Lacy FH, Anagnostou M, Fernandez LM, Otero A, Sands DR, Lacy AM, Wexner SD. <i>Coloproctol</i> . 2018 Oct;22(10):785-791. doi: 10.1007/s10151-018-1860-z                                                                                                                 |

Supplementary Table 3: Perfusion assessment in colorectal surgery

| Ref. No. | Author      | Country           | Journal            | Year | Study design  | Patient selection                                                     |                                                                               | Fluorogenic agent | Dose                    | Route | Imaging techniques                                                                                                    |                                                                                     |                                                                                                                                                  | Endpoint measures                                                                                                 |                                                                           |                                                                                                                                                                                                        | Adverse effects                                                                                                                                                                                             | Learning curve | Cost analysis | Other comments | Ref. detail                                                                                                                                                                                               |                                                                                                                                                                                                               |                                                                                                                                                          |
|----------|-------------|-------------------|--------------------|------|---------------|-----------------------------------------------------------------------|-------------------------------------------------------------------------------|-------------------|-------------------------|-------|-----------------------------------------------------------------------------------------------------------------------|-------------------------------------------------------------------------------------|--------------------------------------------------------------------------------------------------------------------------------------------------|-------------------------------------------------------------------------------------------------------------------|---------------------------------------------------------------------------|--------------------------------------------------------------------------------------------------------------------------------------------------------------------------------------------------------|-------------------------------------------------------------------------------------------------------------------------------------------------------------------------------------------------------------|----------------|---------------|----------------|-----------------------------------------------------------------------------------------------------------------------------------------------------------------------------------------------------------|---------------------------------------------------------------------------------------------------------------------------------------------------------------------------------------------------------------|----------------------------------------------------------------------------------------------------------------------------------------------------------|
|          |             |                   |                    |      |               | Subject                                                               | N                                                                             |                   |                         |       | Imaging system                                                                                                        | Quantitative measurement                                                            | Main endpoints                                                                                                                                   | Imaging accuracy/success rate                                                                                     | Clinical impact, changes in intraoperative decision-making                | Clinical impact, advantages in postoperative outcomes                                                                                                                                                  |                                                                                                                                                                                                             |                |               |                |                                                                                                                                                                                                           |                                                                                                                                                                                                               |                                                                                                                                                          |
| 21       | Brescia     | Italy             | Updates Surg       | 2018 | Retrospective | Laparoscopic colorectal surgery (both benign and malignant neoplasms) | 182 (107 did not receive ICG-VA and 75 received ICG-VA)                       | ICG               | 0.25 mg/kg              | IV    | Prior to resection                                                                                                    | SPHS (Karl Storz)                                                                   | NA                                                                                                                                               | Assess whether ICG-VA reduces postoperative complications                                                         | NA                                                                        | In 6.6% of ICG-VA cases, the reading caused the surgeon to change the planned resection line                                                                                                           | The anastomotic leakage rate was 9.0% in the group that did not receive ICG-VA and zero in the group that received ICG-VA; however, other postoperative complications did not differ between the two groups | None           | NA            | NA             | Ishizuca Y, Pevzner M, Komuro Y, Casapullina M, Pridmore F, Dhillon AJ, Gasparini M, Lazer F. Updates Surg. 2018 Dec;70(4):427-432. doi: 10.1007/s13304-018-05888-9. eprint arXiv:1811.04477v1 [medRxiv]. |                                                                                                                                                                                                               |                                                                                                                                                          |
| 22       | Bornstein   | US                | J Surg Res         | 2018 | Prospective   | Open or laparoscopic-assisted bowel resection                         | 72 bowel end segments from 49 patients                                        | ICG               | NA                      | IV    | After mesenteric division                                                                                             | SPY Elite                                                                           | Trends of fluorescence intensity                                                                                                                 | Compare intraoperative assessment by surgeon and by imaging system                                                | NA                                                                        | Disparity between surgeon assessment and ICG-VA analysis was found in 11 of 72 cases (15%)                                                                                                             | Clinical outcomes were not assessed in this study                                                                                                                                                           | NA             | NA            | NA             | Ferguson TB, Baeer JJ. J Surg Res. 2018 Dec;232:179-185. doi: 10.1016/j.jss.2018.08.026.                                                                                                                  |                                                                                                                                                                                                               |                                                                                                                                                          |
| 23       | Mirzahi     | US                | Tech Coloproctol   | 2018 | Retrospective | Laparoscopic low anterior resection for rectal cancer                 | 30 patients who received ICG-VA and ICG 30 who did not                        | ICG               | 0.1 to 0.3 mg/kg        | IV    | Twice: Prior to bowel resection and after anastomosis                                                                 | PNPOINT (Novada)                                                                    | NA                                                                                                                                               | Assess whether ICG-VA reduces anastomotic leakage                                                                 | NA                                                                        | ICG-VA changed the treatment plan in four patients (13.3%); these patients did not experience anastomotic leakage                                                                                      | Rate of anastomotic leakage was 6.7% in patients who did not receive ICG-VA and zero in patients who received ICG-VA                                                                                        | NA             | NA            | NA             | Fernandez LM, Portucci A, Wolf J, Saadi DR, Wecker SD. Tech Coloproctol. 2018 Jul;22(7):535-540. doi: 10.1007/s10151-018-0271-6.                                                                          |                                                                                                                                                                                                               |                                                                                                                                                          |
| 24       | Kim         | Korea             | J Surg Oncol       | 2019 | Retrospective | Robot-assisted anterior resection in colorectal cancer                | 968 (699 received ICG-VA)                                                     | ICG               | NA                      | IV    | NA                                                                                                                    | Firefly TM, Intuitive Surgical Inc.                                                 | NA                                                                                                                                               | Effect of ICG-VA use on anastomotic complications                                                                 | NA                                                                        | NA                                                                                                                                                                                                     | Use of ICG-VA reduced anastomotic complications                                                                                                                                                             | NA             | NA            | NA             | Use of ICG-VA reduced anastomotic complications                                                                                                                                                           | Kim J, Lee J, Kim W, Lam S, Ahn J, Lee H, Park SH. J Surg Oncol. 2019 Dec;120(8):1450-1445. doi: 10.1002/jso.25476.                                                                                           |                                                                                                                                                          |
| 25       | Hayami      | Japan             | Tech Coloproctol   | 2019 | Prospective   | Laparoscopic surgery for colorectal cancer                            | 22 (patients at high risk for anastomotic leakage were selected specifically) | ICG               | 5 mg/2 mL               | IV    | After anastomosis                                                                                                     | D-light P system, Karl Storz                                                        | Trends of fluorescence intensity                                                                                                                 | Effect of ICG-VA use in predicting anastomotic leakage                                                            | NA                                                                        | In one case, the leakage was identified by delayed fluorescence in ICG-VA                                                                                                                              | Four patients experienced anastomotic leakage                                                                                                                                                               | NA             | NA            | NA             | NA                                                                                                                                                                                                        | Kawai M, Hasegawa S, Okada K, Miyazawa M, Tamura K, Mizumoto Y, Kitahara Y, Mizumoto Y, Yamane K. Tech Coloproctol. 2019 Oct;23(10):973-980. doi: 10.1007/s10151-019-02089-5.                                 |                                                                                                                                                          |
| 26       | Ogino       | Japan             | J Surg Res         | 2019 | Prospective   | Colorectal surgery                                                    | 74                                                                            | ICG               | 5 mg                    | IV    | After dividing the mesentery and central vessels along the planned transection line and before completing anastomosis | Photodynamic Eye System, Hamamatsu Photonics                                        | NA                                                                                                                                               | Intraoperative determination of anastomotic hypoperfusion                                                         | 100%                                                                      | Transection line was changed in six patients (8.1%)                                                                                                                                                    | One patient experienced postoperative anastomotic leakage; all other patients healed uneventfully                                                                                                           | NA             | NA            | NA             | NA                                                                                                                                                                                                        | Use of ICG-VA is effective in detecting anastomotic hypoperfusion                                                                                                                                             | Ogino T, Hara T, Kawada J, Okano M, Kim Y, Okuyama M, Tsubanaka T. J Surg Res. 2019 Dec;244:265-271. doi: 10.1016/j.jss.2019.06.050.                     |
| 27       | van den Bos | The Netherlands   | Surg Endosc        | 2019 | Prospective   | Anastomotic colorectal cancer surgery (laparoscopic or robotic)       | 30                                                                            | ICG               | 0.2 mg/kg (three times) | IV    | After bowel devascularization, before transection, and after anastomosis                                              | D-light P system, Karl Storz                                                        | Fluorescence was scored subjectively from 1 to 5 by the surgeon; intensity was then measured postoperatively by the software from the recordings | Effect of ICG-VA use in predicting anastomotic leakage                                                            | 60% (in 19 out of 30 patients, all three ICG-VA sessions were successful) | In six patients (20%), the dissection location was changed from ICG-VA readings. One of these six patients developed anastomotic leakage                                                               | Five patients developed anastomotic leakage                                                                                                                                                                 | NA             | NA            | NA             | NA                                                                                                                                                                                                        | van den Bos J, Jongen ACM, Melnhout J, Broekink SO, Louwers K, Schol RM, Bouvy ND, Stassen JPS. Surg Endosc. 2019 Nov;33(11):1766-1774. doi: 10.1007/s00464-019-06073-6.                                      |                                                                                                                                                          |
| 28       | Higashijima | Japan             | J Med Invest       | 2019 | Retrospective | Laparoscopic anterior resection                                       | 24                                                                            | ICG               | 7.5 mg                  | IV    | After resection of the rectal cancer                                                                                  | Hyper Eye Medical System (HEMS, Mituba Medical)                                     | NA                                                                                                                                               | Intraoperative determination of blood flow in the remnant colon                                                   | 100%                                                                      | Two of the 24 patients (8.3%) experienced anastomotic leakage and exhibited delayed fluorescence time; additional resection was then performed                                                         | NA                                                                                                                                                                                                          | NA             | NA            | NA             | NA                                                                                                                                                                                                        | Higashijima J, Yamana M, Komawa A, Miyama T, Tokunaga T, Nishi M, Kashiwara H, Takasa C. J Med Invest. 2019;96(6):2365-69. doi: 10.1155/2019/236569.                                                          |                                                                                                                                                          |
| 29       | Wada        | Japan             | Int J Clin Oncol   | 2019 | Retrospective | Laparoscopic low anterior resection in rectal cancer                  | 149                                                                           | ICG               | 5 mg                    | IV    | After dividing the colonic mesentery at the planned transection site                                                  | PDE-sys system, Hamamatsu Photonics KK, Hamamatsu, Japan                            | NA                                                                                                                                               | Effect of ICG-VA use in reducing anastomotic leakage                                                              | NA                                                                        | Thirteen patients (9%) underwent additional colon resection following ICG-VA                                                                                                                           | Leakage occurred in four of these 13 patients, but in only one of the 35 patients whose ICG-VA readings did not change the course of the operation                                                          | NA             | NA            | NA             | NA                                                                                                                                                                                                        | Wada T, Kawada K, Hashino N, Hasegawa S, Yoshitomi M, Hida K, Sakai Y. Int J Clin Oncol. 2019 Apr;24(4):394-402. doi: 10.1007/s10147-018-1365-5.                                                              |                                                                                                                                                          |
| 30       | Dinallo     | US                | Am J Surg          | 2019 | Retrospective | Colorectal surgery                                                    | 234 who received ICG-VA and 220 who did not receive ICG-VA                    | ICG               | 2 mL                    | IV    | Before anastomosis                                                                                                    | SPY Elite                                                                           | The software grades the intensity of fluorescence from 0 to 246                                                                                  | Effect of ICG-VA use in reducing anastomotic leakage                                                              | NA                                                                        | ICG-VA altered the planned treatment in 13 patients (6%)                                                                                                                                               | Leakage rates did not vary between patients who received and did not receive ICG-VA                                                                                                                         | NA             | NA            | NA             | NA                                                                                                                                                                                                        | ICG-VA can alter intraoperative decisions but not the clinical outcome in colorectal surgery                                                                                                                  | Dinallo AM, Kolanick P, Boyan WP, Proyniak B, James A, Dressner RM, Aravanto ML. Am J Surg. 2019 Jul;218(1):133-139. doi: 10.1016/j.amjsurg.2018.10.027. |
| 31       | Son         | Korea             | Surg Endosc        | 2019 | Prospective   | Laparoscopic colorectal surgery                                       | 86 (laparoscopic low anterior resection: 55; anterior resection: 31)          | ICG               | 0.25 mg/kg              | IV    | After mesenteric division                                                                                             | IMAGE1 S (Karl Storz)                                                               | Trends of fluorescence intensity                                                                                                                 | Predict anastomotic complications from ICG-VA patterns                                                            | NA                                                                        | NA                                                                                                                                                                                                     | Incidence of anastomotic complications was 7% (six patients)                                                                                                                                                | NA             | NA            | NA             | NA                                                                                                                                                                                                        | Son GM, Kwon MS, Kim Y, Kim J, Kim SH, Lee JW. Surg Endosc. 2019 May;33(5):1640-1649. doi: 10.1007/s00464-018-6439-y.                                                                                         |                                                                                                                                                          |
| 32       | Chang       | Hong Kong         | Surgon             | 2019 | Prospective   | Left-sided colorectal resection                                       | 110                                                                           | ICG               | 5 mg                    | IV    | Prior to resection and anastomosis                                                                                    | SPY Elite                                                                           | The software grades the intensity of fluorescence from 0 to 255                                                                                  | Differences between planned resection site and actual resection site as a function of ICG-VA during the operation | NA                                                                        | Transection site was revised in 34.5% of cases; median distance between planned and actual site was 2.3 cm (range: 1-17 cm); three patients (2.7%) were spared from a diversion stoma following ICG-VA | Leakage rate was 6 out of 100 patients (5.5%); only one required surgery                                                                                                                                    | NA             | NA            | NA             | NA                                                                                                                                                                                                        | Chang YK, Foo CC, Yip J, Wei R, Ng KK, Lo O, Cho HK, Lam WL. Surgon. 2019 Oct;17(2):270-79. doi: 10.1016/j.surg.2018.08.006.                                                                                  |                                                                                                                                                          |
| 33       | Spinelli    | Italy/Switzerland | Colorectal Disease | 2019 | Retrospective | Rectal pouch and anastomosis (PPAA)                                   | 32 (+ 32 matched controls)                                                    | ICG               | 0.25 mg/kg              | IV    | During pouch construction and enlightening maneuvers, after anastomosis (transally)                                   | PNPOINT® Endoscopic Fluorescence Imaging System (Stryker, Kalamazoo, Michigan, USA) | Fluorescence was scored subjectively by the surgeon                                                                                              | Fluorescent signal quality, duration of the ICG procedure, anastomotic leak                                       | 100% technical success                                                    | 1 case, intraoperative recto-pouch construction and anastomosis                                                                                                                                        | 0% anastomotic leak (1 case in the control group) p=NS                                                                                                                                                      | None           | NA            | NA             | NA                                                                                                                                                                                                        | Spinelli A, Carvello M, Kente P G, Maroli A, Montoni I, Manera M, Busca NG, Ris F. Rectal pouch-anal anastomosis with fluorescence angiography: a case-matched study. Colorectal Dis. 2019 Jul;21(7):827-832. |                                                                                                                                                          |

NA, not available or not assessed
